# Supplementary material
Source: PubMed Central journal article supplement (PMC7489967)

**Supplemental materials for:**

Pandey M, Nicolay S, Clark M, Desjarlais V, Clay A, Skinner S. Wellness Wheel mobile outreach clinic: a community-led care model improving access to care in indigenous communities. *Ann Fam Med.* 2020;18(5):466-466.

Mamata Pandey, PhD<sup>1</sup>

Susanne Nicolay, BScN<sup>2</sup>

Megan Clark, MD<sup>2,3</sup>

Val Desjarlais, BA<sup>4</sup>

Adam Clay, MSc<sup>1</sup>

Stuart Skinner, MD<sup>5</sup>

<sup>1</sup>Research Department, Saskatchewan Health Authority, Regina, Saskatchewan, Canada

<sup>2</sup>Wellness Wheel, Regina, Saskatchewan, Canada

<sup>3</sup>Department of Family Medicine, University of Saskatchewan, Regina, Saskatchewan, Canada

<sup>4</sup>Department of Health, Touchwood Agency Tribal Council, Punnichy, Saskatchewan, Canada;

<sup>5</sup>Department of Infectious Disease, University of Saskatchewan, Regina, Saskatchewan, Canada

**Key words:** outreach; indigenous health; partnership

Submitted October 23, 2019; submitted, revised, February 13, 2020; accepted March 10, 2020.

Previous presentation: Wellness Wheel, Inc: The Delivery of Primary and Chronic Diseases Care, and Communicable Disease Services to Indigenous Communities in Saskatchewan; The 28th Annual Canadian Conference on HIV/AIDS Research; May 9-12, 2019; Saskatoon, Saskatchewan, Canada.

Conflicts of interest: S.S. has served on an advisory board and/or received grant funding from Gilead Sciences, Merck Canada, Viiv Healthcare, and Abbvie. Other authors report none.

---

**Figure 1: The Wellness Wheel care model.**

RN = registered nurse; WW = Wellness Wheel.

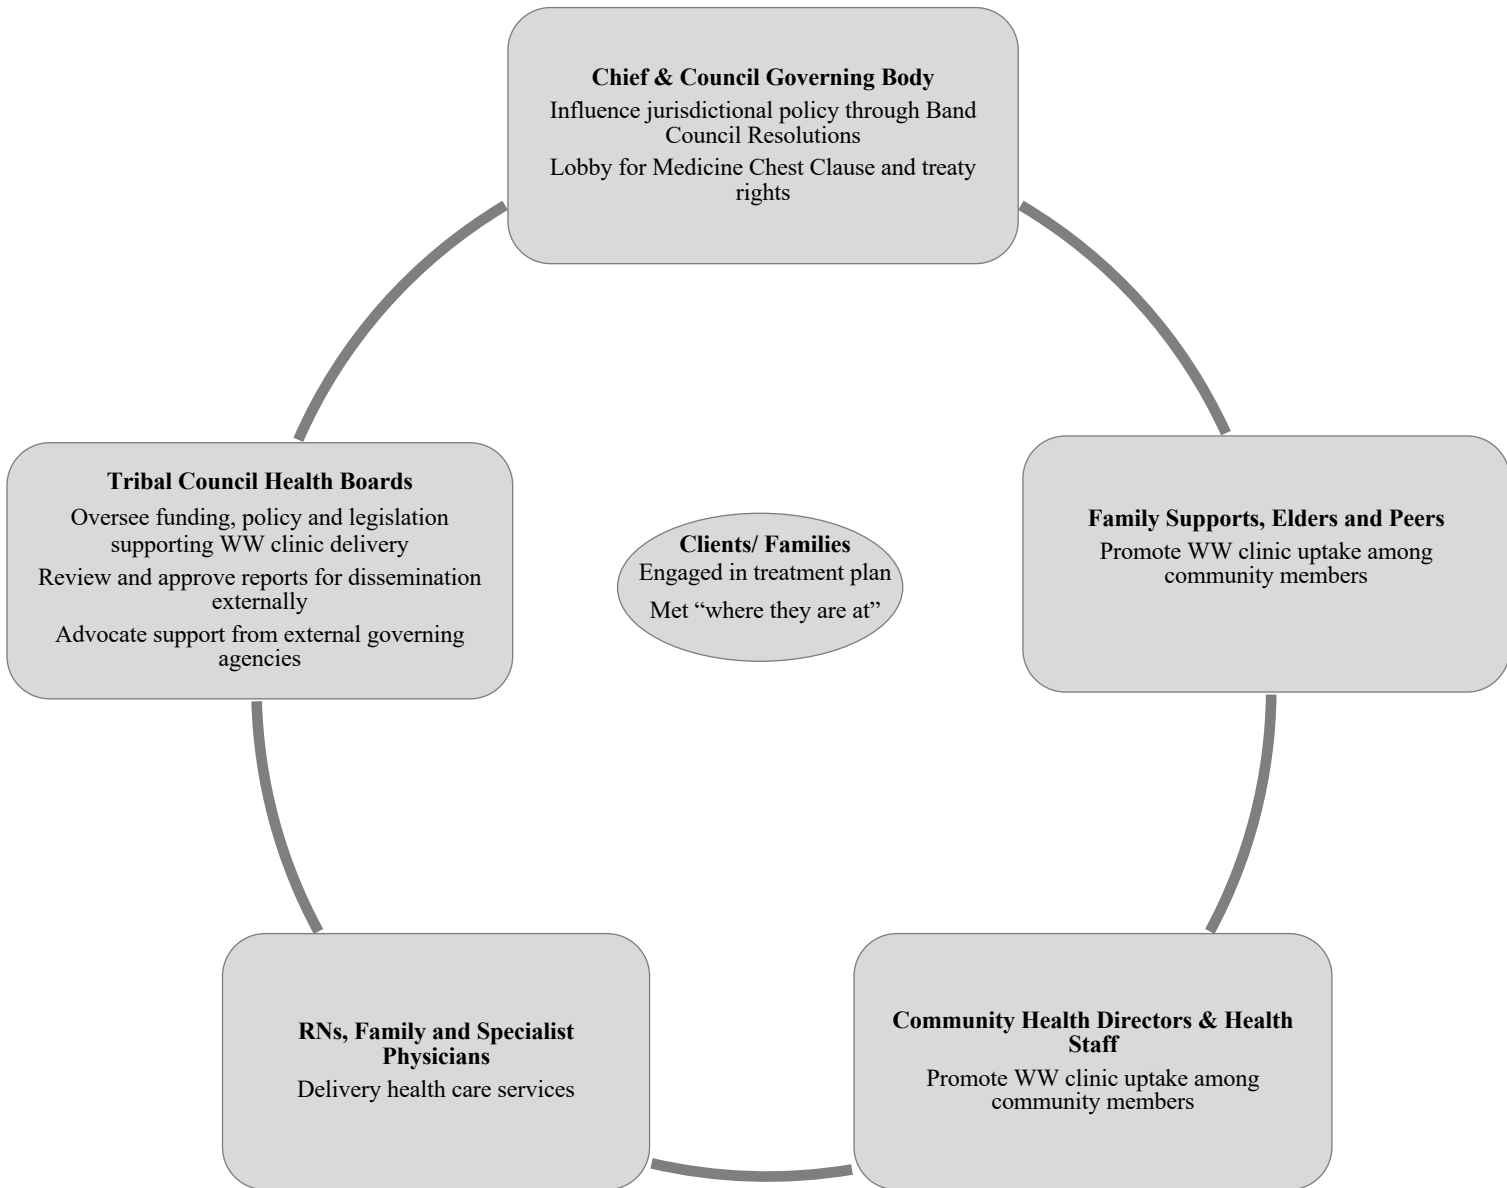

Supplement: Skinner-inno_Supp_App.pdf [file Skinner-inno_Supp_App.pdf]
